# Supplementary material for: A Molecular Prognostic Model Predicts Esophageal Squamous Cell Carcinoma Prognosis
Source: PubMed Central journal article supplement (PMC4143329; doi:10.1371/journal.pone.0106007), 2014-08-25
Supplement: pone.0106007.s001.pdf [file pone.0106007.s001.pdf]

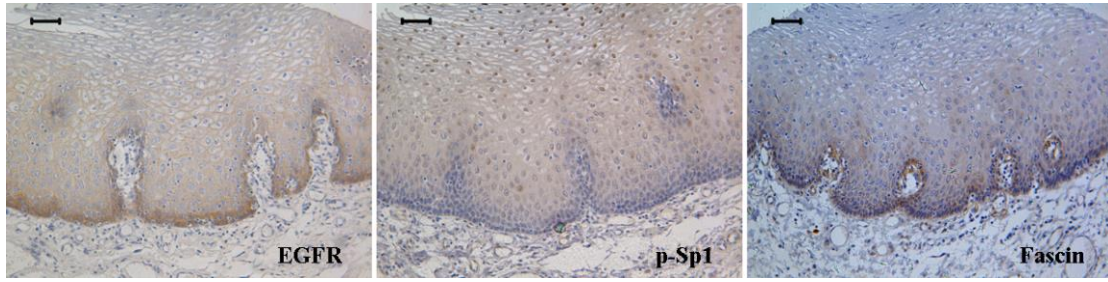

**Figure S1** Representative images of IHC staining for EGFR, p-Sp1, and Fascin in epithelium tissue adjacent to carcinoma. Scale bars = 50  $\mu$ m.
