# Supplementary material for: A Molecular Prognostic Model Predicts Esophageal Squamous Cell Carcinoma Prognosis
Source: PubMed Central journal article supplement (PMC4143329; doi:10.1371/journal.pone.0106007), 2014-08-25
Supplement: pone.0106007.s003.pdf [file pone.0106007.s003.pdf]

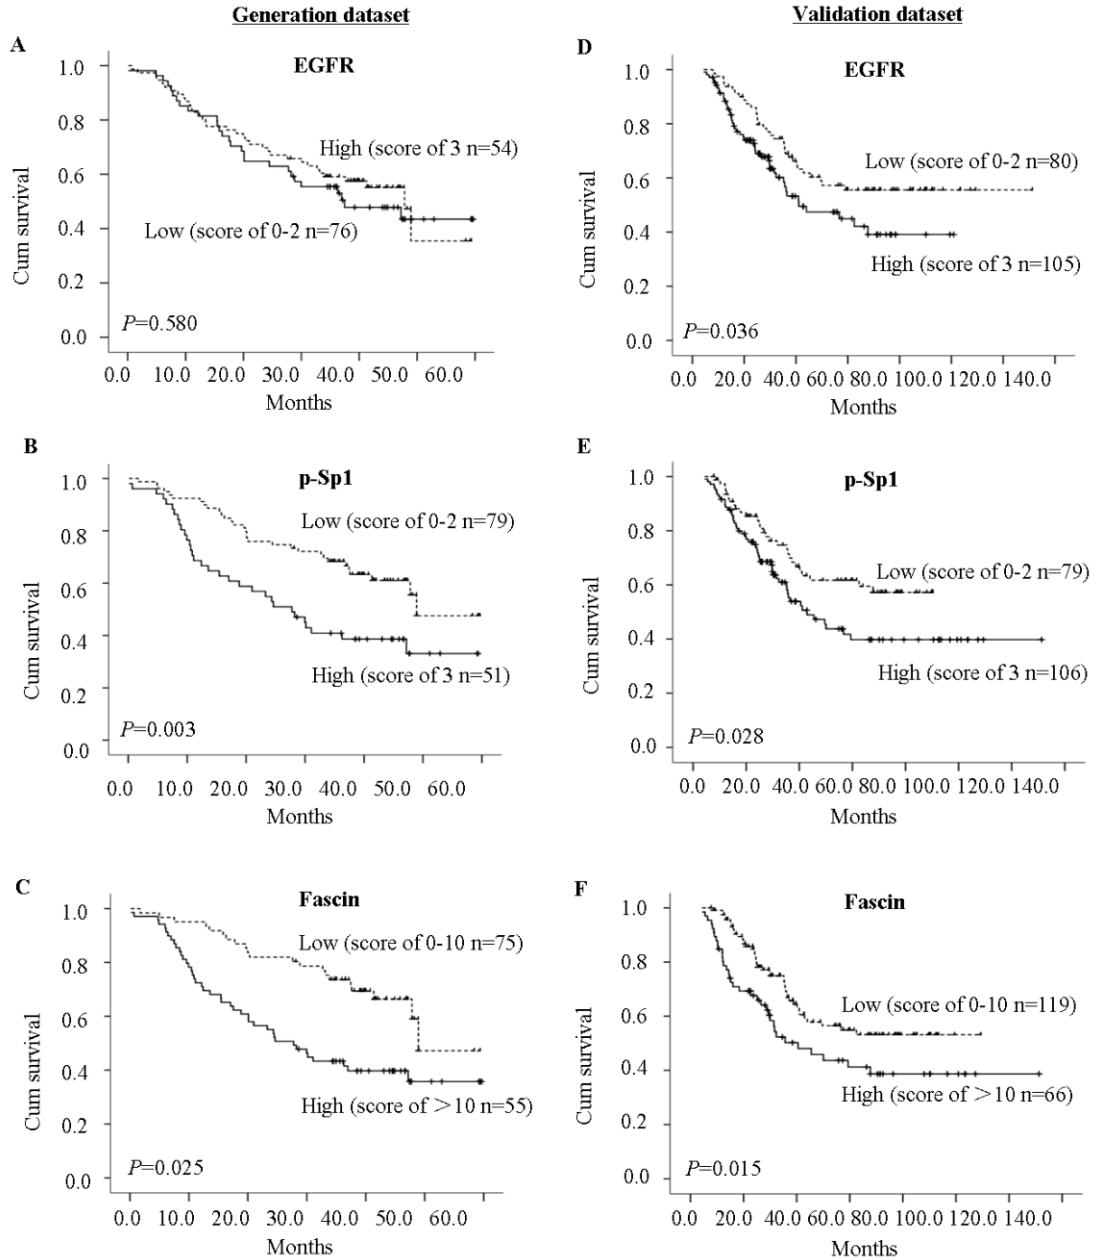

**Figure S3** Kaplan-Meier analysis of overall survival for EGFR, p-Sp1 and Fascin in generation dataset of 130 cases (A, B and C) and validation dataset of 185 cases (D, E and F).
