# Supplementary material for: A Molecular Prognostic Model Predicts Esophageal Squamous Cell Carcinoma Prognosis
Source: PubMed Central journal article supplement (PMC4143329; doi:10.1371/journal.pone.0106007), 2014-08-25
Supplement: pone.0106007.s004.pdf [file pone.0106007.s004.pdf]

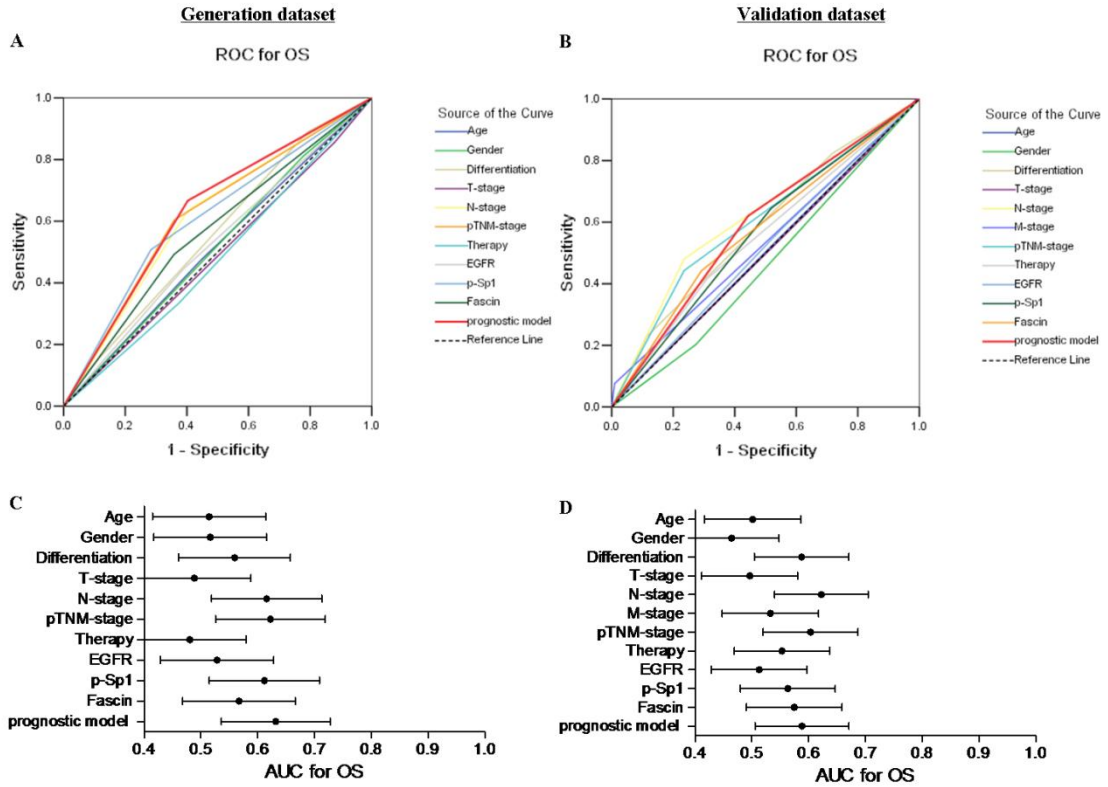

**Figure S4** The predictive ability of the molecular prognostic model compared with individual markers and other clinical prognostic parameters by receiver operating characteristic (ROC) curves (A for generation dataset, B for validation dataset). The areas under the curve (AUCs) with 95% CI for OS are shown in C (generation dataset) and D (validation dataset).
